# Supplementary material
Source: PubMed Central journal article supplement (PMC6724153)
Supplement: jamaneurol-76-1484-s001.pdf [file jamaneurol-76-1484-s001.pdf]

## Supplementary Online Content

Helwig SA, Ragoschke-Schumm A, Schwindling L, et al. Prehospital stroke management optimized by the use of clinical scoring vs mobile stroke unit for triage of patients with stroke: a randomized clinical trial. *JAMA Neurol*. Published online September 3, 2019. doi:10.1001/jamaneurol.2019.2829

**eFigure.** Areas of Mobile Stroke Unit Activity in a State-Wide Network With Stroke-Treating Hospitals Providing Different Levels of Care (Primary and Comprehensive Stroke Centers)

**eTable.** Prespecified Safety End Points and Other Serious Adverse Events at Day 7

This supplementary material has been provided by the authors to give readers additional information about their work.

**eFigure.** Areas of Mobile Stroke Unit Activity in a State-Wide Network With Stroke-Treating Hospitals Providing Different Levels of Care (Primary and Comprehensive Stroke Centers)

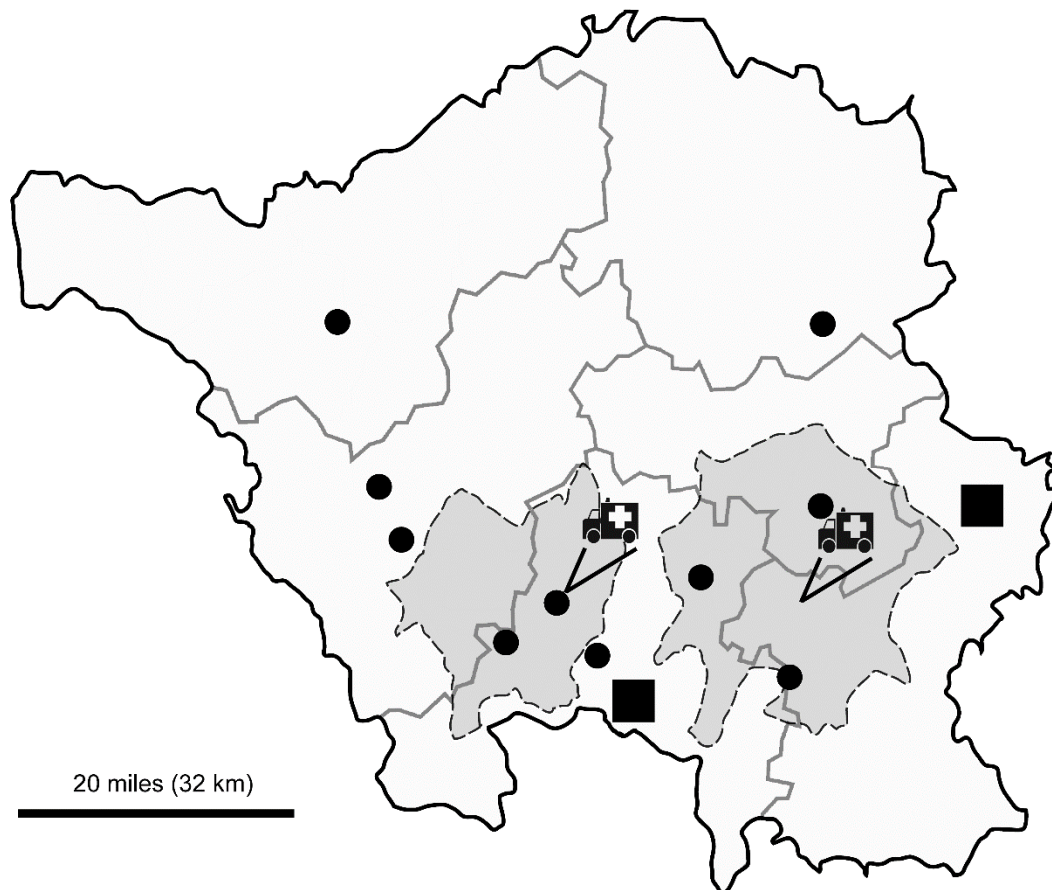

The catchment area was based on isochrones of 16 minutes (gray areas) around 2 EMS stations in the state of Saarland, Germany, where the Mobile Stroke Unit (ambulance symbols) was located. From the emergency site, patients were transferred to the nearest stroke network hospital offering the individually required level of care (eight primary stroke centers, small circles; two comprehensive stroke centers, large squares).

**eTable.** Prespecified Safety End Points and Other Serious Adverse Events at Day 7

|                                                    | <b>OPM group<br/>(n=53)</b> | <b>MSU group<br/>(n=63)</b> |
|----------------------------------------------------|-----------------------------|-----------------------------|
| <b>Safety endpoints</b>                            |                             |                             |
| Survival                                           | 49 (92.5)                   | 60 (95.2)                   |
| Stroke-related or neurologic death                 | 4 (7.5)                     | 3 (4.8)                     |
| Fatal ischaemic stroke                             | 0 (0)                       | 0 (0)                       |
| Fatal reinfarction                                 | 0 (0)                       | 0 (0)                       |
| Fatal primary ICH                                  | 4 (7.5)                     | 3 (4.8)                     |
| Fatal secondary ICH                                | 0 (0)                       | 0 (0)                       |
| Non-fatal reinfarction                             | 2 (3.8)                     | 0 (0)                       |
| Non-fatal secondary ICH (change in NIHSS $\geq$ 4) | 1 (1.9)                     | 0 (0)                       |
| Non-fatal edema (change in NIHSS $\geq$ 4)         | 3 (5.7)                     | 0 (0)                       |
| <b>Other serious adverse events</b>                |                             |                             |
| Peripheral hemorrhage                              | 0 (0)                       | 0 (0)                       |
| Seizure                                            | 1 (1.9)                     | 1 (1.6)                     |
| Sepsis                                             | 1 (1.9)                     | 2 (3.2)                     |
| Thrombosis / pulmonary embolism                    | 0 (0)                       | 0 (0)                       |
| Renal insufficiency                                | 0 (0)                       | 1 (1.6)                     |
| Allergic response to contrast agent <sup>a</sup>   | 0 (0)                       | 1 (1.6)                     |

Data are presented as n (%). ICH, intracranial hemorrhage; LAMS, Los Angeles Motor Scale; MSU, mobile stroke unit; NIHSS, National Institutes of Health Stroke Scale; OPM, optimized prehospital management.

<sup>a</sup> Skin rash successfully treated with antihistamine and steroidal drugs.
