# Supplementary material
Source: PubMed Central journal article supplement (PMC6724153)
Supplement: jamaneurol-76-1484-s003.pdf [file jamaneurol-76-1484-s003.pdf]

## **Data Sharing Statement**

Helwig. Prehospital Stroke Management Optimized by Use of Clinical Scoring vs Mobile Stroke Unit for Triage of Patients With Stroke. *JAMA Neurol*. Published September 03, 2019.

10.1001/jamaneurol.2019.2829

### **Data**

**Data available:** No
